# Supplementary material for: Activation of cyclin B1–Cdk1 synchronizes events in the nucleus and the cytoplasm at mitosis
Source: PubMed Central journal article supplement — J Cell Biol. 2010 Apr 19;189(2):247–59. doi: 10.1083/jcb.200909144 (PMC2856909; doi:10.1083/jcb.200909144), 2010-04-19
Supplement: supp_jcb.200909144_JCB_200909144_sm.pdf [file supp_jcb.200909144_JCB_200909144_sm.pdf]

Gavet and Pines, <http://www.jcb.org/cgi/content/full/jcb.200909144/DC1>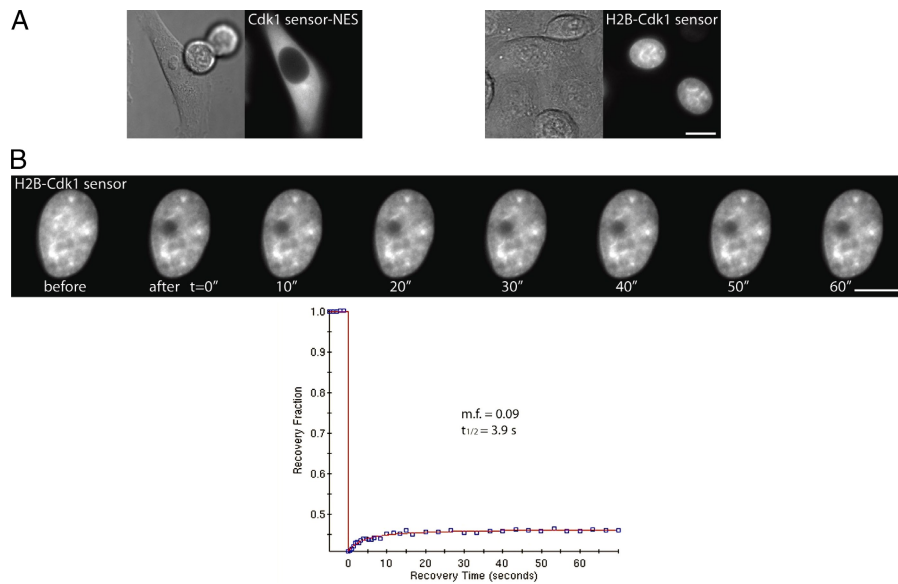

Figure S1. **The nuclear targeted FRET sensor is stably associated with chromatin.** (A) Fluorescence and DIC images of cells expressing either the cytoplasmic (NES) or nuclear targeted (histone H2B) cyclin B1-Cdk1 FRET sensor. (B) FRAP experiment showing the stable association of H2B-cyclin B1-Cdk1 FRET sensor with chromatin ( $n = 6$ ). Images were taken before and immediately after bleaching at the indicated times. Fluorescence images (top) and quantification of the fluorescence recovery in the bleached area (bottom) are shown with the calculated mobile fraction (mf) and half-life of recovery. Bars, 10  $\mu$ m.

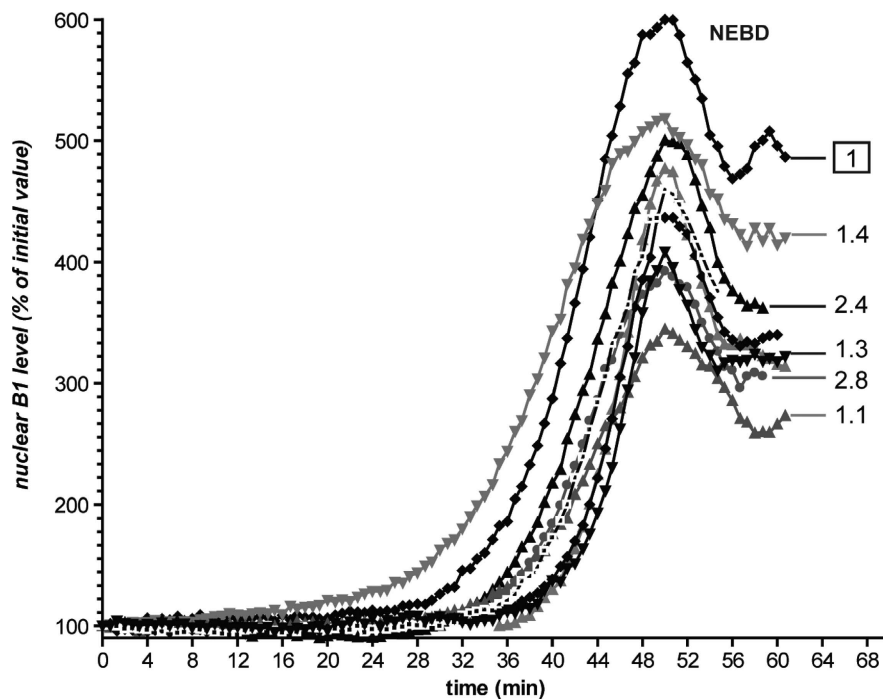

Figure S2. **Kinetics of cyclin B1 nuclear accumulation is independent of the expression level.** The nuclear accumulation of cyclin B1-GFP was quantified on optical sections in different cells entering prophase ( $n = 9$ ). To quantify the expression level of cyclin B1, the mean GFP signal in a region of the cytoplasm was determined for each cell in G2 (at  $t = 0$ ) and normalized to the lowest expressing cell. For clarity, only six values are displayed on the right. For clarity, only six values are displayed on the right, and the values for only six cells are plotted. Note that the timing and rate of cyclin B1 nuclear accumulation are independent of the expression level.

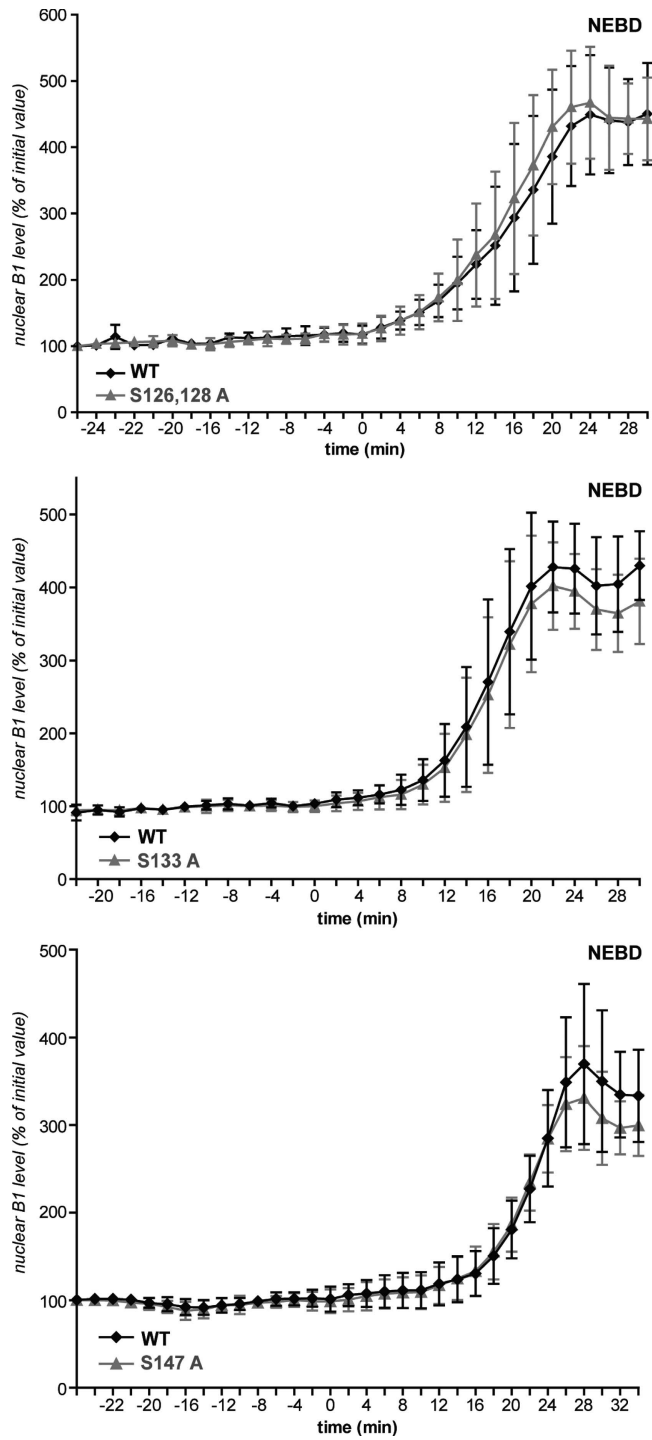

Figure S3. **Nuclear accumulation of cyclin B1 in prophase is independent of its phosphorylation on Ser126, 128, 133, and 147.** Nuclear accumulation of cyclin B1 was assayed in cells coexpressing wild-type (WT) cyclin B1-mCherry and one of the following mutants: Ser126- and 128A-, Ser133A-, or Ser147A-cyclin B1-GFP. Mean curves  $\pm$  SEM of quantifications in different cells are displayed for each experiment ( $n = 4, 4,$  and  $6,$  respectively).

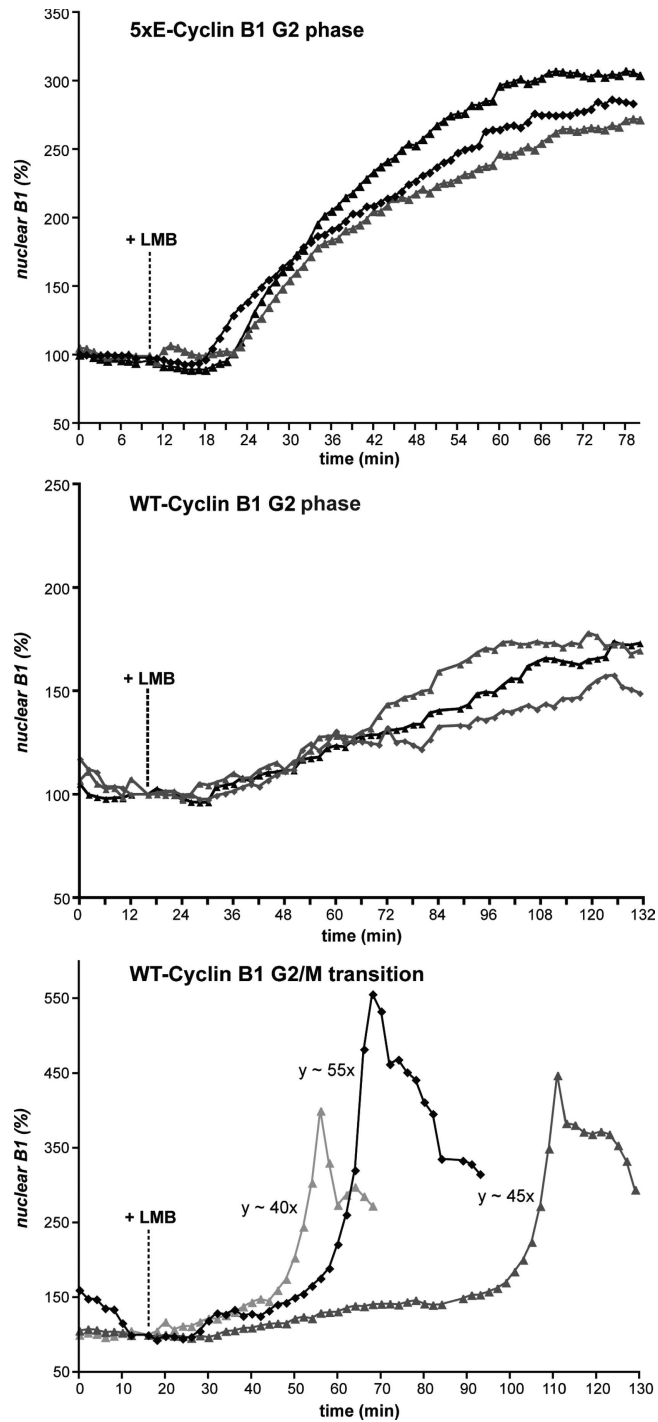

Figure S4. **Cyclin B1 nuclear import rate increases significantly at mitotic entry.** Cells expressing 5xE (top) or wild-type (WT; middle and bottom) cyclin B1 were recorded, and the nuclear import was quantified after adding 20 nM LMB to cells in G2 phase. Note the sudden increase of the wild-type cyclin B1 import rate when cells enter in mitosis. The results from three different cells are shown for each experiment.

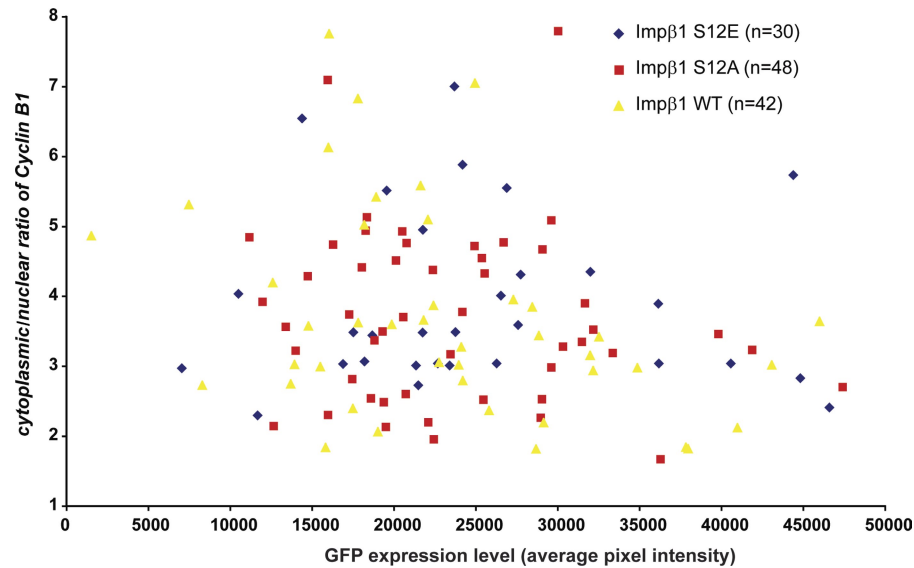

Figure S5. **The nuclear/cytoplasmic distribution of cyclin B1 in interphase is not affected by overexpression of wild-type or phosphorylation mutants of importin  $\beta$ 1.** Cells coexpressing wild-type (WT) cyclin B1–mCherry and untagged wild-type, Ser12A, or Ser12E mutants of importin  $\beta$ 1 (imp  $\beta$ 1) expressed from a vector with GFP under the control of an IRES (p-importin  $\beta$ 1–IRES2–GFP vectors) were assayed. The nuclear/cytoplasmic ratio of cyclin B1 and the expression level of GFP were quantified on optical sections of asynchronous interphase cells and are plotted against each other. The number of cells analyzed in each condition is indicated.

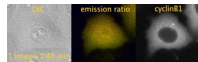

Video 1. **HeLa cell expressing FRET sensor and cyclin B1 entering mitosis.** HeLa cells cotransfected with the FRET sensor and cyclin B1–mCherry constructs were recorded using a microscope (Deltavision; Applied Precision) with a frequency of one frame every 1 min 40 s. Intensity-modulated display of the emission ratio and cyclin B1 level are displayed at middle and right, respectively.

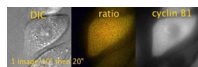

Video 2. **HeLa cell expressing FRET sensor and cyclin B1 treated with a Cdk inhibitor during prophase.** HeLa cells cotransfected with the FRET sensor and cyclin B1–mCherry were recorded using a microscope (Deltavision; Applied Precision) with a frequency of one frame every 10 s and then every 20 s (at  $t \approx 14$  min). 300 nM Cdk1/2 inhibitor III was added in prophase at  $t \approx 4$  min. Intensity-modulated display of the emission ratio and cyclin B1 level are displayed at middle and right, respectively.

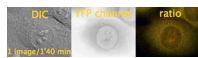

Video 3. **HeLa cell expressing FRET sensor targeted to both the nucleus and the cytoplasm undergoing mitosis.** HeLa cells cotransfected with the cytoplasmic and nuclear targeted FRET sensor were recorded using a microscope (Deltavision; Applied Precision) with a frequency of one frame every 1 min 40 s. The acceptor emission (inverted greyscale; middle) shows the distribution of the sensors, and the emission ratio (intensity-modulated display; right) shows the activity of cyclin B1–Cdk1.

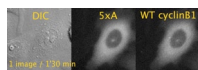

Video 4. **HeLa cell expressing the 5xA Ala mutant and wild-type cyclin B1 entering mitosis.** HeLa cells cotransfected with 5xA–cyclin B1–GFP (middle) and wild-type (WT) cyclin B1–mCherry (right) were recorded using a microscope (Deltavision; Applied Precision) with a frequency of one frame every 1 min 30 s.

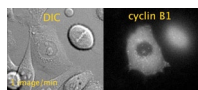

Video 5. **HeLa cell expressing wild-type cyclin B1 entering mitosis and treated with the Plk inhibitor BI 2536.** HeLa cells transfected with wild-type cyclin B1–mCherry were recorded using a microscope (Deltavision; Applied Precision) with a frequency of one frame per minute. 100 nM of the Plk inhibitor BI 2536 was added at  $t \approx 10$  min.

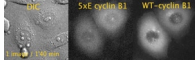

Video 6. **HeLa cell expressing the 5xE glutamic acid mutant and wild-type cyclin B1 entering mitosis and treated with a Cdk inhibitor.** HeLa cells cotransfected with 5xE cyclin B1-GFP (middle) and wild-type (WT) cyclin B1-mCherry (right) were recorded using a microscope (Deltavision; Applied Precision) with a frequency of one frame every 1 min 40 s. 300 nM Cdk inhibitor III was added at  $t \approx 10$  min.

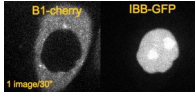

Video 7. **HeLa cell expressing wild-type cyclin B1-mCherry and IBB-GFP entering mitosis.** HeLa cells cotransfected with wild-type cyclin B1-mCherry (left) and IBB-GFP (right) were recorded using a spinning-disk microscope (Intelligent Imaging Innovations) with a frequency of one frame every 30 s.

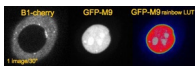

Video 8. **HeLa cell expressing wild-type cyclin B1-mCherry and GFP-M9 entering mitosis.** HeLa cells cotransfected with wild-type cyclin B1-mCherry (left) and GFP-M9 (middle and right) were recorded using a spinning-disk microscope with a frequency of one frame every 30 s.

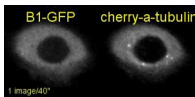

Video 9. **HeLa cell expressing wild-type cyclin B1-GFP and mCherry-α-tubulin entering mitosis.** HeLa cells cotransfected with wild-type cyclin B1-GFP (left) and mCherry-α-tubulin (right) were recorded using a spinning-disk microscope with a frequency of one frame every 40 s.

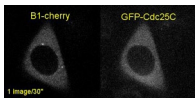

Video 10. **HeLa cell expressing wild-type cyclin B1-mCherry and GFP-Cdc25C entering mitosis.** HeLa cells cotransfected with the wild-type cyclin B1-mCherry (left) and GFP-Cdc25C (right) were recorded using a spinning-disk microscope with a frequency of one frame every 30 s.

## Supplemental data

Ypet Polo box domain flexible linker phosphorylation site cerulean Flag tag

Purple indicates a restriction site.

Cyclin B1–Cdk1 FRET sensor:

**GCTAGCGCTACCGGTATGGTGAGCAAAGGCGAAGAGCTGTTACCCGGCGTGGTGCC**  
CATCTTGGTGGAGCTGGACGGCGACGTGAACGGCCACAAGTTCAGCGTGAGCGGCG  
AGGGCGAGGGCGACGCCACCTACGGCAAGCTGACCCTGAAGCTGCTGTGCACCACC  
GGCAAGCTGCCCGTGCCCTGGCCCACCCTGGTGACCACCCTGGGCTACGGCGTGCAG  
TGCTTCGCCCCGTACCCCGACCACATGAAGCAGCACGACTTCTTCAAGAGCGCCATG  
CCCGAGGGCTACGTGCAGGAGCGGACCATCTTCTTCAAGGACGACGGCAACTACAA  
GACCCGGGCCGAGGTGAAGTTCGAGGGCGACACCCTGGTGAACCGGATCGAGCTGA  
AGGGCATCGACTTCAAGGAGGACGGCAACATCCTGGGCCACAAGCTGGAGTACAAC  
TACAACAGCCACAACGTGTACATCACCGCCGACAAGCAGAAGAACGGCATCAAGGC  
CAACTTCAAGATCCGGCACAACATCGAGGACGGCGGCGTGCAGCTGGCCGACCACT  
ACCAGCAGAACACCCCATCGGGCGACGGCCCCGTGCTGCTGCCCGACAACCACTACC  
TGAGCTACCAGAGCGCCCTGTTCAAGGACCCCAACGAGAAGCGGGACCACATGGTG  
CTGCTGGAGTTCCTGACCGCCCGCCGGCATCACCGAGGGCATGAACGAGCTCTATAAG  
**AGATCT**CACCTCAGTGACATGCTGCAGCAGCTGCACAGTGTCAATGCCTCCAAGCCC  
TCGGAGCGTGGGCTGGTCAGGCAAGAGGAGGCTGAGGATCCTGCCTGCATCCCCATC  
TTCTGGGTGAGCAAGTGGGTGGACTATTCGGACAAGTACGGCCTTGGGTATCAGCTC  
TGTGATAACAGCGTGGGGGTGCTCTTCAATGACTCAACACGCCTCATCCTCTACAAT  
GATGGTGACAGCCTGCAGTACATAGAGCGTGACGGCACTGAGTCCTACCTACCGTG  
AGTTCCCATCCCAACTCCTTGATGAAGAAGATCACCCCTCCTTAAATATTTCCGCAATT  
ACATGAGCGAGCACTTGCTGAAGGCAGGTGCCAACATCACGCCGCGCGAAGGTGAT  
GAGCTCGCCCGGCTGCCCTACCTACGGACCTGGTTCGCGACCCCGCAGCGCCATCATC  
CTGCACCTCAGCAACGGCAGCGTGCAGATCAACTTCTTCCAGGATCACACCAAGCTC  
ATCTTGTGCCCACTGATGGCAGCCGTGACCTACATCGACGAGAAGCGGGACTTCCGC  
ACATAACCGCCTGAGTCTCCTGGAGGAGTACGGCTGCTGCAAGGAGCTGGCCAGCCGG  
CTCCGCTACGCCCGCACTATGGTGGACAAGCTGCTGAGCGGGCGGCACAGGCGGCA  
**CAGGCGGCACAGGCGGCACAGGCGGTACCCCTGAGCCTATTTTGGTTGATACTTC**  
CTCTCCAAGCCCAATGGAAACACT**CGAG**ATGGTGAGCAAGGGCGAGGAGCTGTTCA  
CCGGGGTGGTGGCCATCCTGGTCGAGCTGGACGGCGACGTAACGGCCACAAGTTCA  
GCGTGTCCGGCGAGGGCGAGGGCGATGCCACCTACGGCAAGCTGACCCTGAAGTTC  
ATCTGCACCACCGGCAAGCTGCCCGTGCCCTGGCCCACCCTCGTGACCACCCTGACC  
TGGGGCGTGCAGTGCTTCGCCCGCTACCCCGACCACATGAAGCAGCACGACTTCTTC  
AAGTCCGCCATGCCCGAAGGCTACGTCCAGGAGCGCACCATCTTCTTCAAGGACGAC  
GGCAACTACAAGACCCGCGCCGAGGTGAAGTTCGAGGGCGACACCCTGGTGAACCG  
CATCGAGCTGAAGGGCATCGACTTCAAGGAGGACGGCAACATCCTGGGGCACAAGC  
TGAGTACAACGCCATCAGCGACAACGTCTATATCACCGCCGACAAGCAGAAGAAC  
GGCATCAAGGCCAACTTCAAGATCCGCCACAACATCGAGGACGGCAGCGTGCAGCT  
CGCCGACCACTACCAGCAGAACACCCCATCGGGCGACGGCCCCGTGCTGCTGCCCGA  
CAACCACTACCTGAGCACCCAGTCCAAGCTGAGCAAAGACCCCAACGAGAAGCGCG

ATCACATGGTCCTGCTGGAGTTCGTGACCGCCGCCGGGATCACTCTCGGCATGGACG  
AGCTGTACAAGGATTACAAGGATGACGACGATAAGTAAGGATCC

Cyclin B1–Cdk1 FRET sensor **NES**:

...CCATCGGCGACGGCCCCGTGCTGCTGCCGACAACCACTACCTGAGCACCCAGTC  
CAAGCTGAGCAAAGACCCCAACGAGAAGCGCGATCACATGGTCCTGCTGGAGTTCG  
TGACCGCCGCCGGGATCACTCTCGGCATGGACGAGCTGTACAAGGGCGGCGGCTTG  
CCCCCTTGAGCGCTTGACCTTGGCTAAGGATCC

**H2B** flexible linker cyclin B1–Cdk1 FRET sensor:

GCTAGCATGCCAGAGCCAGCGAAGTCTGCTCCCGCCCCGAAAAAGGGCTCCAA  
GAAGGCGGTGACTAAGGCGCAGAAGAAAGGCGGCAAGAAGCGCAAGCGCAGC  
CGCAAGGAGAGCTATTCCATCTATGTGTACAAGTTCTGAAGCAGGTCCACCC  
TGACACCGGCATTTCTGTCGAAGGCCATGGGCATCATGAATTCGTTTGTGAACG  
ACATTTTCGAGCGCATCGCAGGTGAGGCTTCCCGCCTGGCGCATTACAACAAG  
CGCTCGACCATCACCTCCAGGGAGATCCAGACGGCCGTGCGCCTGCTGCTGCC  
TGGGGAGTTGGCCAAGCACGCCGTGTCCGAGGGTACTAAGGCCATCACCAAGT  
ACACCAGCGCTAAGGGAGGAACAGGAGGAACAGGAGGAACAGGAGGAACCGGTA  
TGGTGAGCAAAGGCGAAGA...

Cyclin B1–**mCherry**:

ATGGCGCTCCGAGTCACCAGGAACTCGAAAATTAATGCTGAAAATAAGGCGAA  
GATCAACATGGCAGGCGCAAAGCGCGTTCCTACGGCCCCCTGCTGCAACCTCCA  
AGCCCGGACTGAGGCCAAGAACAGCTCTTGGGGACATTGGTAACAAAGTCAGT  
GAACAACCTGCAGGCCAAAATGCCTATGAAGAAGGAAGCAAAACCTTCAGCTAC  
TGGAAGAGTCATTGATAAAAACTACCAAAACCTCTTGAAAAGGTACCTATGCT  
GGTGCCAGTGCCAGTGTCTGAGCCAGTGCCAGAGCCAGAACCTGAGCCAGAAC  
CTGAGCCTGTAAAGAAGAAAACTTTCGCCTGAGCCTATTTTGGTTGATACTG  
CCTCTCCAAGCCCAATGGAAACATCTGGATGTGCCCTGCAGAAGAAGACCTG  
TGTCAGGCTTTCTCTGATGTAATCTTGCAGTAAATGATGTGGATGCAGAAGAT  
GGAGCTGATCCAAACCTTTGTAGTGAATATGTGAAAGATATTTATGCTTATCTG  
AGACAACCTGAGGAAGAGCAAGCAGTCAGACCAAAATACCTACTGGGTCGGGA  
AGTCACTGGAAACATGAGAGCCATCCTAATTGACTGGCTAGTACAGGTTCAAAT  
GAAATTCAGGTTGTTGCAGGAGACCATGTACATGACTGTCTCCATTATTGATCG  
GTTTCATGCAGAATAATTGTGTGCCAAGAAGATGCTGCAGCTGGTTGGTGTC  
CTGCCATGTTTATTGCAAGCAAAATATGAAGAAATGTACCCTCCAGAAATTGGTG  
ACTTTGCTTTTGTGACTGACAACACTTATACTAAGCACCAATCAGACAGATGG  
AAATGAAGATTCTAAGAGCTTTAAACTTTGGTCTGGGTCGGCCTCTACCTTTGC  
ACTTCTTCGGAGAGCATCTAAGATTGGAGAGGTTGATGTGCGAGCAACATACTT  
TGGCCAAATACCTGATGGAACATACTATGTTGGACTATGACATGGTGCACCTTC  
CTCCTTCTCAAATTGCAGCAGGAGCTTTTTGCTTAGCACTGAAAATTCTGGATA  
ATGGTGAATGGACACCAACTCTACAACATTACCTGTCATATACTGAAGAATCTC  
TTCTTCCAGTTATGCAGCACCTGGCTAAGAATGTAGTCATGGTAAATCAAGGAC

TTACAAAGCACATGACTGTCAAGAACAAGTATGCCACATCGAAGCATGCTAAGA  
TCAGCACTCTACCACAGCTGAATTCTGCACTAGTTCAAGATTTAGCCAAGGCTG  
TGGCAAAGGTTCTAGAGGATCCACCGGTCGCCACCATGATGGTGAGCAAGGGCG  
AGGAGGATAACATGGCCATCATCAAGGAGTTCATGCGCTTCAAGGTGCACATG  
GAGGGCTCCGTGAACGGCCACGAGTTCGAGATCGAGGGCGAGGGCGAGGGCC  
GCCCCTACGAGGGCACCCAGACCGCCAAGCTGAAGGTGACCAAGGGTGGCCC  
CCTGCCCTTCGCTGGGACATCCTGTCCCCTCAGTTCATGTACGGCTCCAAGGC  
CTACGTGAAGCACCCCGCCGACATCCCCGACTACTTGAAGCTGTCCTTCCCCG  
AGGGCTTCAAGTGGGAGCGCGTGATGAACTTCGAGGACGGCGGCGTGTTGAC  
CGTGACCCAGGACTCCTCCCTGCAGGACGGCGAGTTCATCTACAAGGTGAAGC  
TGCGCGGCACCAACTTCCCCTCCGACGGCCCCGTAATGCAGAAGAAGACCATG  
GGCTGGGAGGCCTCCTCCGAGCGGATGTACCCCGAGGACGGCGCCCTGAAGG  
GCGAGATCAAGCAGAGGCTGAAGCTGAAGGACGGCGGCCACTACGACGCTGA  
GGTCAAGACCACCTACAAGGCCAAGAAGCCCGTGCAGCTGCCCGGCGCCTACA  
ACGTCAACATCAAGTTGGACATCACCTCCCACAACGAGGACTACACCATCGTG  
GAACAGTACGAACGCGCCGAGGGCCGCGCCACTCCACCGGCGGCATGGACGAGC  
TGTACAAGTAA

mCherry- $\alpha$ -tubulin:

ATGGTGAGCAAGGGCGAGGAGGATAACATGGCCATCATCAAGGAGTTCATGCG  
CTTCAAGGTGCACATGGAGGGCTCCGTGAACGGCCACGAGTTCGAGATCGAGG  
GCGAGGGCGAGGGCCGCCCTACGAGGGCACCCAGACCGCCAAGCTGAAGGT  
GACCAAGGGTGGCCCCCTGCCCTTCGCTGGGACATCCTGTCCCCTCAGTTCA  
TGTACGGCTCCAAGGCCTACGTGAAGCACCCCGCCGACATCCCCGACTACTTG  
AAGCTGTCCTTCCCCGAGGGCTTCAAGTGGGAGCGCGTGATGAACTTCGAGGA  
CGGCGGCGTGTTGACCGTGACCCAGGACTCCTCCCTGCAGGACGGCGAGTTCA  
TCTACAAGGTGAAGCTGCGCGGCACCAACTTCCCCTCCGACGGCCCCGTAATG  
CAGAAGAAGACCATGGGCTGGGAGGCCTCCTCCGAGCGGATGTACCCCGAGG  
ACGGCGCCCTGAAGGGCGAGATCAAGCAGAGGCTGAAGCTGAAGGACGGCGG  
CCACTACGACGCTGAGGTCAAGACCACCTACAAGGCCAAGAAGCCCGTGCAGC  
TGCCCGGCGCCTACAACGTCAACATCAAGTTGGACATCACCTCCCACAACGAG  
GACTACACCATCGTGGAACAGTACGAACGCGCCGAGGGCCGCGCCACTCCACCGG  
CGGCATGGACGAGCTGTACAAGGGATCTCGAGTGCCTGAGTGCATCTCCATCC  
ACGTTGGCCAGGCTGGTGTCCAGATTGGCAATGCCTGCTGGGAGCTCTACTGC  
CTGGAACACGGCATCCAGCCCAGTGGCCAGATGCCAAGTGACAAGACCATTGG  
GGGAGGAGATGACTCCTTCAACACCTTCTTCAGTGAGACGGGCGCTGGCAAGC  
ACGTGCCCCGGGCTGTGTTTGTAGACTTGGAAACCACAGTCATTGATGAAGTT  
CGCACTGGCACCTACCGCCAGCTCTTCCACCCTGAGCAGCTCATCACAGGCAA  
GGAAGATGCTGCCAATAACTATGCCCGAGGGCACTACACCATTGGCAAGGAGA  
TCATTGACCTTGTGTTGGACCGAATTCGCAAGCTGGCTGACCAGTGCACCGGT  
CTTCAGGGCTTCTTGGTTTTCCACAGCTTTGGTGGGGGAACTGGTTCTGGGTTC  
ACCTCCCTGCTCATGGAACGTCTCTCAGTTGATTATGGCAAGAAGTCCAAGCTG  
GAGTTCTCCATTTACCCAGCACCCAGGTTTCCACAGCTGTAGTTGAGCCCTAC  
AACTCCATCCTCACCACCCACACCCTGGAGCACTCTGATTGTGCCTTCATG  
GTAGACAATGAGGCCATCTATGACATCTGTTCGTAGAAACCTCGATATCGAGCG  
CCCAACCTACACTAACCTTAACCGCCTTATTAGCCAGATTGTGTCTCCATCAC



TGCTTCCCTGAGATTTGATGGAGCCCTGAATGTTGACCTGACAGAATTCCAGAC  
CAACCTGGTGCCCTACCCCGCATCCACTTCCCTCTGGCCACATATGCCCTGT  
CATCTCTGCTGAGAAAGCCTACCATGAACAGCTTTCTGTAGCAGAGATCACCAA  
TGCTTGCTTTGAGCCAGCCAACCAGATGGTGAAATGTGACCCTCGCCATGGTA  
AATACATGGCTTGCTGCCTGTTGTACCGTGGTGACGTGGTTCCTCAAAGATGTCA  
ATGCTGCCATTGCCACCATCAAAACCAAGCGCAGCATCCAGTTTGTGGATTGGT  
GCCCCACTGGCTTCAAGGTTGGCATCAACTACCAGCCTCCCCTGTGGTGCCT  
GGTGGAGACCTGGCCAAGGTACAGAGAGCTGTGTGCATGCTGAGCAACACCAC  
AGCCATTGCTGAGGCCTGGGCTCGCCTGGACCACAAGTTTGACCTGATGTATG  
CCAAGCGTGCCTTTGTTCACTGGTACGTGGGTGAGGGGATGGAGGAAGGCGAG  
TTTTCAAGGGCCCGTGAAGATATGGCTGCCCTTGAGAAGGATTATGAGGAGGT  
TGGTGTGGATTCTGTTGAAGGAGAGGGTGAAGGAAGAAGGAGAGGAATACTAA

pIBB-GFP:

ATTAAAGAGGAGAAATTAAGCATGCGCACGAACGAGAATGCTAATACACCAGCT  
GCCCGTCTTACAGATTCAAGAACAAGGGAAAAGACAGTACAGAAATGAGGCG  
TCACAGAATAGAGGTCAATGTGGAGCTGAGGAAAGCTAAGAAGGATGACCAGA  
TGCTGAAGAGGAGAAATGTAAGCTCATTTCCTGATGATGCTACTTCTCCATGA  
ACAGCAAGGGCGAGGAGCTGTTACCGGGGTGGTGCCCATCCTGGTCGAGCTG  
GACGGCGACGTAAACGGCCACAAGTTCAGCGTGTCCGGCGAGGGCGAGGGCG  
ATGCCACCTACGGCAAGCTGACCCTGAAGTTCATCTGCACCACCGGCAAGCTG  
CCCGTGCCCTGGCCCACCCTCGTGACCACCCTGACCTACGGCGTGCAGTGCTT  
CAGCCGCTACCCCGACCACATGAAGCAGCACGACTTCTTCAAGTCCGCCATGC  
CCGAAGGCTACGTCCAGGAGCGCACCATCTTCTTCAAGGACGACGGCAACTAC  
AAGACCCGCGCCGAGGTGAAGTTCGAGGGCGACACCCTGGTGAACCGCATCGA  
GCTGAAGGGCATCGACTTCAAGGAGGACGGCAACATCCTGGGGCACAAGCTGG  
AGTACA ACTACAACAGCCACAACGTCTATATCATGGCCGACAAGCAGAAGAAC  
GGCATCAAGGTGAACTTCAAGATCCGCCACAACATCGAGGACGGCAGCGTGCA  
GCTCGCCGACCACTACCAGCAGAACACCCCATCGGCGACGGCCCCGTGCTGC  
TGCCCGACAACCACTACCTGAGCACCCAGTCCGCCCTGAGCAAAGACCCCAAC  
GAGAAGCGCGATCACATGGTCCTGCTGGAGTTCGTGACCGCCGCGGGATCAC  
TCTCGGCATGGACGAGCTGTACAAGTAA

pEGFP-M9:

ACCATGGTGAGCAAGGGCGAGGAGCTGTTACCGGGGTGGTGCCCATCCTGGT  
CGAGCTGGACGGCGACGTAAACGGCCACAAGTTCAGCGTGTCCGGCGAGGGC  
GAGGGCGATGCCACCTACGGCAAGCTGACCCTGAAGTTCATCTGCACCACCGG  
CAAGCTGCCCCGTGCCCTGGCCCACCCTCGTGACCACCCTGACCTACGGCGTGC  
AGTGCTTCAGCCGCTACCCCGACCACATGAAGCAGCACGACTTCTTCAAGTCC  
GCCATGCCCGAAGGCTACGTCCAGGAGCGCACCATCTTCTTCAAGGACGACGG  
CAACTACAAGACCCGCGCCGAGGTGAAGTTCGAGGGCGACACCCTGGTGAACC  
GCATCGAGCTGAAGGGCATCGACTTCAAGGAGGACGGCAACATCCTGGGGCAC  
AAGCTGGAGTACA ACTACAACAGCCACAACGTCTATATCATGGCCGACAAGCA  
GAAGAACGGCATCAAGGTGAACTTCAAGATCCGCCACAACATCGAGGACGGCA

**GCGTGCAGCTCGCCGACCACTACCAGCAGAACACCCCCATCGGGCGACGGCCCC  
GTGCTGCTGCCCAGACAACCACTACCTGAGCACCCAGTCCGCCCTGAGCAAAGA  
CCCCAACGAGAAGCGCGATCACATGGTCCTGCTGGAGTTCGTGACCGCCGCCG  
GGATCACTCTCGGCATGGACGAGCTGTACAAGAGATCCAGATCCAGATCTAATC  
AGTCTTCAAATTTTGGACCCATGAAGGGAGGAAATTTTGGAGGCAGAAGCTCT  
GGCCCCTATGGCGGTGGAGGCCAATACTTTGCAAACACGAAACCAAGGTGG  
CTATGGCGGTTCCAGCAGCAGCAGTAGCTATGGCAGTGGCAGAAGATT**
